# Supplementary material for: Audible Feedback Improves Internal Model Strength and Performance of Myoelectric Prosthesis Control
Source: PubMed Central journal article supplement (PMC5986794; doi:10.1038/s41598-018-26810-w), 2018-06-04
Supplement: 41598_2018_26810_MOESM1_ESM.pdf [file 41598_2018_26810_MOESM1_ESM.pdf]

# Audible Feedback Improves Internal Model Strength and Performance of Myoelectric Prosthesis Control

Ahmed W. Shehata<sup>1,2,\*</sup>, Erik J. Scheme<sup>1,2</sup>, and Jonathon W. Sensinger<sup>1,2</sup>

<sup>1</sup>University of New Brunswick, Electrical and Computer Engineering, Fredericton, E3B5A3, Canada

<sup>2</sup>Institute of Biomedical Engineering, Fredericton, E3B5A3, Canada

\*ahmed.shehata@unb.ca

## Supplementary Material

### Appendix

| Outcome measure                 | Controller learning effect | Dependent paired t-test |
|---------------------------------|----------------------------|-------------------------|
| Adaptation rate                 | FLT effect on AUG          | t (3) = -2.1, p = 0.17  |
|                                 | AUG effect on RAW          | t (3) = -1.7, p = 0.34  |
|                                 | AUG effect on FLT          | t (3) = -0.20, p = 0.86 |
|                                 | RAW effect on AUG          | t (3) = -0.61, p = 0.65 |
| JND                             | FLT effect on AUG          | t (3) = 0.50, p = 0.66  |
|                                 | AUG effect on RAW          | t (3) = 3.0, p = 0.090  |
|                                 | AUG effect on FLT          | t (3) = 5.7, p = 0.029  |
|                                 | RAW effect on AUG          | t (3) = -1.6, p = 0.26  |
| Internal model uncertainty      | FLT effect on AUG          | t (3) = 1.9, p = 0.20   |
|                                 | AUG effect on RAW          | t (3) = -0.0070, p = 1  |
|                                 | AUG effect on FLT          | t (3) = 1.4, p = 0.25   |
|                                 | RAW effect on AUG          | t (3) = 0.38, p = 0.73  |
| On-axis target path efficiency  | FLT effect on AUG          | t (3) = 2.2, p = 0.30   |
|                                 | AUG effect on RAW          | t (3) = -3.0, p = 0.10  |
|                                 | AUG effect on FLT          | t (3) = -1.45, p = 0.38 |
|                                 | RAW effect on AUG          | t (3) = -14, p = 0.005  |
| On-axis target accuracy         | FLT effect on AUG          | t (3) = 0.03, p = 0.98  |
|                                 | AUG effect on RAW          | t (3) = -1.7, p = 0.23  |
|                                 | AUG effect on FLT          | t (3) = 23, p = 0.028   |
|                                 | RAW effect on AUG          | t (3) = -0.96, p = 0.44 |
| Off-axis target path efficiency | FLT effect on AUG          | t (3) = 0.61, p = 0.61  |
|                                 | AUG effect on RAW          | t (3) = -1.7, p = 0.24  |
|                                 | AUG effect on FLT          | t (3) = 0.74, p = 0.54  |
|                                 | RAW effect on AUG          | t (3) = 0.61, p = 0.61  |
| Off-axis target accuracy        | FLT effect on AUG          | t (3) = -1.5, p = 0.27  |
|                                 | AUG effect on RAW          | t (3) = 0.95, p = 0.44  |
|                                 | AUG effect on FLT          | t (3) = 2.5, p = 0.13   |
|                                 | RAW effect on AUG          | t (3) = -2.8, p = 0.11  |

**Table A1.** Statistical analysis using dependent t-test for subgroups 2, 4, 5, and 6 to investigate possible learning effect.

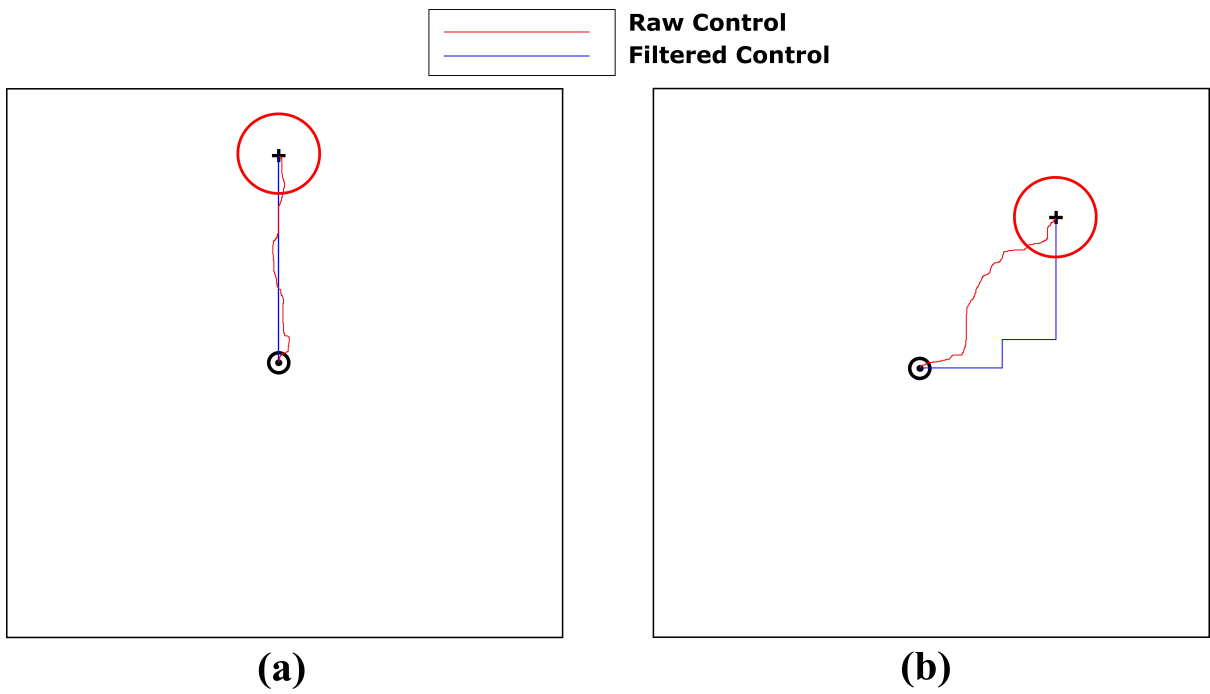

**Figure A1.** Sample trajectory of using Raw control and Filtered control to reach (a) on-axis target (b) off-axis target. Raw Control trajectory in red and filtered control trajectory in blue.
